# Supplementary material for: High Adsorption Graphene Oxide Prepared by Graphite Anode from Spent Lithium-Ion Batteries for Methylene Blue Removal
Source: MDPI journal article supplement (doi:10.3390/batteries8110249), 2022-11-20
Supplement: s1 [file s1]

**High performance graphene oxide prepared by graphite anode from spent  
lithium-ion batteries for methylene blue removal**

Yu Qiao<sup>1,2</sup>, Huaping Zhao<sup>2</sup>, Zhonghao Rao<sup>3,4\*</sup> and Yong Lei<sup>2\*</sup>

*1. School of Electrical and Power Engineering, China University of Mining and Technology, 221116, Xuzhou, China.*

*2. Fachgebiet Angewandte Nanophysik, Institut für Physik & IMN MacroNano, Technische Universität Ilmenau, 98693 Ilmenau, Germany*

*3. School of Energy and Environmental Engineering, Hebei University of Technology, 300401, Tianjin, China*

*4. Hebei Key Laboratory of Thermal Science and Energy Clean Utilization, Hebei University of Technology, 300401, Tianjin, China*

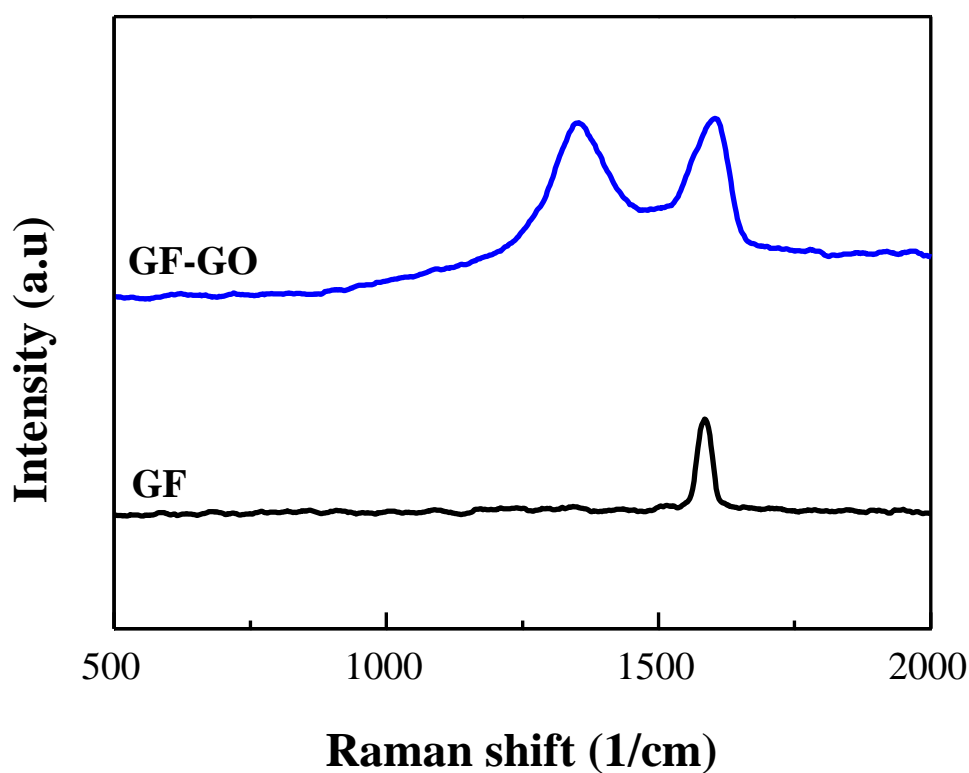

**Figure S1.** Raman spectra of commercial graphite flakes (GF) and graphite oxide (GO) prepared by GF

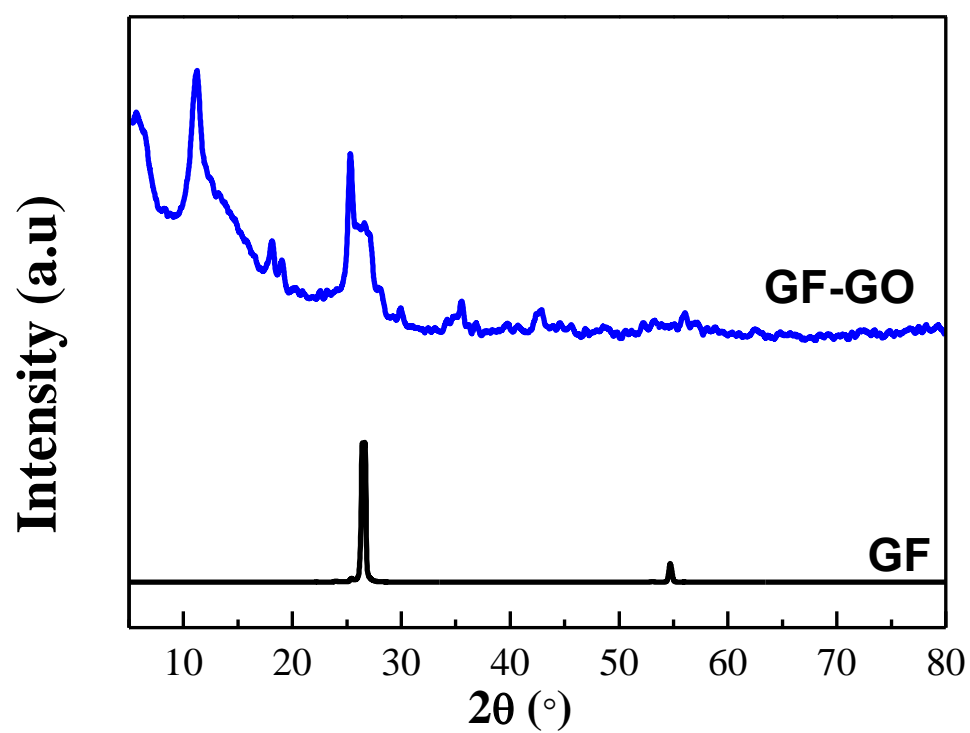

**Figure S2.** XRD images of GF and GO prepared by GF

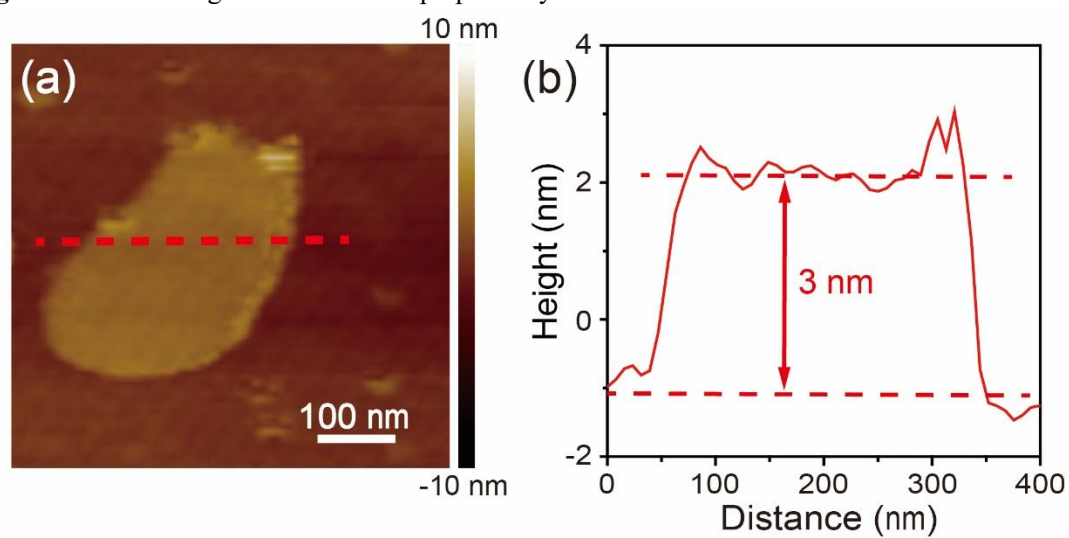

**Figure S3.** AFM images of prepared GO
